# Supplementary material for: Quantifying numerical and spatial reliability of hippocampal and amygdala subdivisions in FreeSurfer
Source: PubMed Central journal article supplement (PMC10082143; doi:10.1186/s40708-023-00189-5), 2023-04-07
Supplement: 40708_2023_189_MOESM1_ESM.pdf [file 40708_2023_189_MOESM1_ESM.pdf]

## **Additional file: Quantifying Numerical and Spatial Reliability of Amygdala and Hippocampal Subdivisions in FreeSurfer**

Isabella Kahhale, Nicholas J Buser, Christopher R. Madan, & Jamie L. Hanson

The main analyses in our manuscript process the scans using the FreeSurfer 7 cross-sectional pipeline; here, we consider Dice coefficients, ICCs, and Bland-Altman statistics from scans processed using the longitudinal stream. The longitudinal processing stream takes results from all time points of the cross-sectional analysis to derive a within-subject template that is used in further processing stages. This method has been shown to reduce variability and avoid over-regularization in processing steps (see Reuter et al., 2012 for more details).

### **Results**

#### **Hippocampus Subfield Reliability using Longitudinal Pipeline**

Using ICC analysis, several hippocampal subfields demonstrated decreased reliability when analyzed using the longitudinal processing stream compared to the cross-sectional processing stream. These include the following bilateral subfields: parasubiculum, presubiculum head, CA4 body, GC ML DG body, and HATA. The hippocampal fissure (bilaterally) was highlighted as an area with less-than-excellent reliability across both processing streams.

Dice coefficients processed using the FreeSurfer Longitudinal pipeline demonstrated greater spatial reliability compared to Dice coefficients processed using the Cross-sectional pipeline. 18 of the 19 regions considered showed “excellent” spatial reliability, while 1 region (the hippocampal fissure, both left and right) showing poor

spatial reliability (Dice Coefficient $<0.5$ ). Notably, this region had consistently poor spatial reliability across both the longitudinal and cross-sectional pipeline. See Table S1 for the DICE coefficients, ICCs, and Bland-Altman statistics for Hippocampal subfields processed using the longitudinal pipeline.

Table S1.

| Region                  | ICC LH | ICC RH | Dice LH | Dice RH | Bias as POV LH | Bias Range LH   | Bias as POV RH | Bias Range RH   |
|-------------------------|--------|--------|---------|---------|----------------|-----------------|----------------|-----------------|
| Parasubiculum           | 0.860  | 0.871  | 0.799   | 0.795   | 0.294%         | 0.000 - 52.632% | 0.897%         | 0.000 - 50.340% |
| Presubiculum Head       | 0.892  | 0.864  | 0.865   | 0.855   | 0.404%         | 0.000 - 40.486% | 0.378%         | 0.000 - 25.830% |
| Presubiculum Body       | 0.940  | 0.940  | 0.892   | 0.876   | 0.860%         | 0.000 - 36.620% | 0.605%         | 0.000 - 33.210% |
| Subiculum Head          | 0.937  | 0.923  | 0.860   | 0.852   | 0.457%         | 0.000 - 48.235% | 0.663%         | 0.000 - 28.179% |
| Subiculum Body          | 0.950  | 0.929  | 0.902   | 0.896   | 0.586%         | 0.000 - 26.087% | 0.089%         | 0.000 - 27.571% |
| CA1 Head                | 0.973  | 0.974  | 0.871   | 0.872   | 0.424%         | 0.000 - 13.534% | 0.107%         | 0.000 - 13.873% |
| CA1 Body                | 0.946  | 0.944  | 0.843   | 0.851   | 0.714%         | 0.000 - 36.015% | 1.044%         | 0.000 - 32.461% |
| CA3 Head                | 0.916  | 0.925  | 0.762   | 0.765   | 0.533%         | 0.000 - 37.890% | 1.114%         | 0.000 - 33.166% |
| CA3 Body                | 0.931  | 0.929  | 0.749   | 0.759   | 0.907%         | 0.000 - 47.909% | 0.501%         | 0.000 - 47.059% |
| CA4 Head                | 0.908  | 0.909  | 0.871   | 0.872   | 0.591%         | 0.000 - 32.813% | 0.619%         | 0.000 - 24.516% |
| CA4 Body                | 0.855  | 0.865  | 0.885   | 0.877   | 0.974%         | 0.000 - 29.046% | 0.682%         | 0.000 - 33.766% |
| GC ML DG Head           | 0.904  | 0.914  | 0.737   | 0.740   | 0.561%         | 0.000 - 28.085% | 0.440%         | 0.000 - 25.882% |
| GC ML DG Body           | 0.842  | 0.828  | 0.750   | 0.735   | 0.918%         | 0.000 - 29.333% | 0.454%         | 0.000 - 31.788% |
| Molecular Layer HP Head | 0.931  | 0.926  | 0.782   | 0.779   | 0.476%         | 0.000 - 27.397% | 0.264%         | 0.000 - 17.778% |
| Molecular Layer HP Body | 0.895  | 0.909  | 0.771   | 0.763   | 0.266%         | 0.000 - 25.201% | 0.595%         | 0.000 - 23.768% |
| Fimbria                 | 0.918  | 0.896  | 0.783   | 0.767   | 1.201%         | 0.000 - 56.209% | 0.963%         | 0.000 - 76.289% |
| Hippocampal Fissure     | 0.796  | 0.779  | 0.583   | 0.587   | 0.876%         | 0.000 - 92.754% | 2.070%         | 0.000 - 86.667% |
| Hippocampal Tail        | 0.973  | 0.974  | 0.928   | 0.929   | 0.399%         | 0.000 - 22.446% | 0.491%         | 0.000 - 14.022% |
| HATA                    | 0.882  | 0.889  | 0.822   | 0.825   | 1.046%         | 0.000 - 46.154% | 0.489%         | 0.000 - 34.286% |

Additional file Table S1: Intraclass Correlation Coefficients (ICC), Dice Coefficients, Bland–Altman bias as a portion of a volume’s structure (Bias as POV), and Bland-Altman bias ranges for Hippocampal Subfields for left and right hemisphere regions (e.g., ICC LH = Intraclass Correlation Coefficients for left hemisphere; Dice RH = Dice Coefficient for right hemisphere). Color coding is in accordance with excellent [green], good [yellow], poor [red] scores for ICCs and Dice Coefficients (ICC: 0.90-1.00 [excellent], 0.75-0.89 [good], 0.00-0.74 [poor]; Dice Coefficients: 0.70-1.00 [excellent], 0.50-.69 [good], 0-0.49 [poor]). We have also highlighted regions with >1% bias as a portion of a volume’s structure in yellow. Subfield Abbreviations include: Cornu Ammonis (CA), Granule Cell and Molecular Layer of Dentate Gyrus (GC-ML-DG); Hippocampus-Amygdala-Transition-Area (HATA); Hippocampal Parcellation (HP). Values were derived using Freesurfer 7 longitudinal processing stream.

## Amygdala Subnuclei Reliability using Longitudinal Pipeline

A processing error with the Freesurfer longitudinal pipeline occurred for a few brain regions for a subset of participants. This was likely due to the small size of these particular regions. This error effected the following brain regions and subject counts: Left Anterior Amygdaloid Area (n = 73), Right Anterior Amygdaloid Area (n = 70), Left Medial Nucleus (n = 21). The “bias as percent of variance” and “Bland-Altman bias ranges” for the 3 aforementioned brain regions were calculated with the erroneous subjects missing.

Amygdala subnuclei with poor reliability using ICC metrics were relatively consistent across the two processing streams; however, ICC values were lower for regions computed with the longitudinal processing stream. These included the following bilateral subnuclei: central nucleus, medial nucleus, paralaminar nucleus, and the Anterior Amygdaloid Area. The cortical nucleus (bilaterally) was highlighted as an area with poor reliability *only* when using the longitudinal processing stream.

Mirroring results in our main manuscript using the cross-sectional pipeline, more subregions of the amygdala demonstrated decreased spatial reliability. Five regions demonstrated “excellent” reliability, while 3 demonstrated “good” reliability (central, cortical, and paralaminar nuclei) and 1 demonstrated “poor” reliability (the medial nucleus) (see Table S3 for Dice values for all amygdala subregions). The regions with less-than-excellent reliability demonstrated similar spatial reliability across the cross-sectional and longitudinal processing streams.

Table S2.

| Region                       | ICC LH | ICC RH | Dice LH | Dice RH | Bias as POV LH | Bias Range LH    | Bias as POV RH | Bias Range RH    |
|------------------------------|--------|--------|---------|---------|----------------|------------------|----------------|------------------|
| Lateral Nucleus              | 0.966  | 0.956  | 0.929   | 0.924   | 0.295%         | 0.000 - 18.435%  | 0.270%         | 0.000 - 18.848%  |
| Basal Nucleus                | 0.954  | 0.944  | 0.926   | 0.923   | 0.243%         | 0.000 - 20.977%  | 0.367%         | 0.000 - 14.177%  |
| Central Nucleus              | 0.807  | 0.788  | 0.678   | 0.675   | 0.286%         | 0.000 - 50.000%  | 0.123%         | 0.000 - 52.874%  |
| Medial Nucleus               | 0.596  | 0.583  | 0.483   | 0.493   | 5.805%         | 0.000 - 185.185% | 4.612%         | 0.000 - 200.000% |
| Cortical Nucleus             | 0.766  | 0.687  | 0.668   | 0.670   | 1.940%         | 0.000 - 66.667%  | 1.036%         | 0.000 - 63.830%  |
| Accessory Basal Nucleus      | 0.954  | 0.957  | 0.926   | 0.926   | 0.268%         | 0.000 - 24.442%  | 0.591%         | 0.000 - 18.502%  |
| Paralamina Nucleus           | 0.666  | 0.613  | 0.586   | 0.588   | 0.576%         | 0.000 - 60.606%  | 0.501%         | 0.000 - 103.704% |
| Corticoamygdaloid Transition | 0.929  | 0.925  | 0.829   | 0.823   | 0.405%         | 0.000 - 20.930%  | 0.271%         | 0.000 - 18.568%  |
| Anterior Amygdaloid Area     | 0.489  | 0.427  | 0.745   | 0.750   | 0.370%         | 0.000 - 189.744% | 0.473%         | 0.000 - 190.909% |

Additional file Table S2: Intraclass Correlation Coefficients (ICCs), Dice Coefficients, Bland–Altman bias as a portion of a volume’s structure (Bias as POV), and Bland–Altman bias ranges for Amygdala Subnuclei for left and right hemisphere regions (e.g., ICC LH = Intraclass Correlation Coefficients for left hemisphere; Dice RH = Dice Coefficient for right hemisphere). Color coding is in accordance with excellent [green], good [yellow], poor [red] scores for ICCs and Dice Coefficients (ICC: 0.90-1.00 [excellent], 0.75-0.89 [good], 0.00-0.74 [poor]; Dice Coefficients: 0.70-1.00 [excellent], 0.50-0.69 [good], 0-0.49 [poor]). We have also highlighted regions with >1% bias as a portion of a volume’s structure in yellow. Values were derived using Freesurfer 7 longitudinal processing stream.

## **Spatial Reliability Differences in Relation to Person-level and MR-acquisition Factors Using Longitudinal Processing Stream**

We next examined associations between spatial reliability (derived via longitudinal processing) and subject-level variables. Correlations between the Hippocampal-subfield Dice coefficients and subject-level variables are shown in Table S3. Differences in image quality were most significantly and negatively related to volumes in a majority of the hippocampal subfields at the  $p < 0.05$  level (shown in Table S3). Sex, and to an even lesser extent, age, were significantly correlated with a few hippocampal subfield volumes.

Table S3.

| Region                  | MRIQ r Dice |       | Sex r Dice |       | Age r Dice |       |
|-------------------------|-------------|-------|------------|-------|------------|-------|
|                         | LH          | RH    | LH         | RH    | LH         | RH    |
| Parasubiculum           | -0.14       | -0.08 | -0.02      | -0.01 | 0.04       | 0.04  |
| Presubiculum Head       | -0.21       | -0.22 | -0.05      | -0.06 | 0.05       | 0.01  |
| Presubiculum Body       | -0.24       | -0.25 | -0.05      | -0.03 | 0.001      | 0.06  |
| Subiculum Head          | -0.25       | -0.06 | -0.05      | -0.03 | -0.03      | 0.001 |
| Subiculum Body          | -0.20       | -0.16 | 0.003      | -0.01 | 0.00       | 0.06  |
| CA1 Head                | -0.27       | -0.25 | 0.002      | -0.04 | -0.01      | -0.01 |
| CA1 Body                | -0.08       | -0.14 | -0.05      | 0.002 | 0.06       | -0.01 |
| CA3 Head                | -0.18       | -0.15 | -0.02      | -0.12 | 0.06       | 0.04  |
| CA3 Body                | -0.13       | -0.23 | -0.01      | -0.03 | 0.08       | 0.04  |
| CA4 Head                | -0.22       | -0.22 | -0.01      | -0.03 | 0.02       | 0.01  |
| CA4 Body                | -0.12       | -0.21 | -0.02      | -0.02 | 0.05       | 0.02  |
| GC ML DG Head           | -0.23       | -0.18 | 0.00       | -0.05 | 0.002      | 0.01  |
| GC ML DG Body           | -0.17       | -0.22 | -0.02      | -0.07 | 0.05       | 0.03  |
| Molecular Layer HP Head | -0.26       | -0.21 | 0.01       | -0.08 | 0.02       | 0.01  |
| Molecular Layer HP Body | -0.17       | -0.24 | 0.02       | -0.04 | 0.03       | 0.03  |
| Fimbria                 | -0.20       | -0.24 | 0.08       | 0.02  | 0.08       | -0.02 |
| Hippocampal Fissure     | -0.23       | -0.20 | -0.01      | -0.11 | 0.02       | 0.03  |
| Hippocampal Tail        | -0.22       | -0.24 | -0.12      | -0.00 | 0.03       | -0.02 |



|      |       |       |       |       |       |      |
|------|-------|-------|-------|-------|-------|------|
| HATA | -0.18 | -0.12 | -0.03 | -0.12 | -0.03 | 0.04 |
|------|-------|-------|-------|-------|-------|------|

Additional file Table S3: Correlation coefficient for bivariate correlations between Hippocampal Subfield Dice Coefficients and subject-level covariates: MRI Quality (Difference Score; MRIQ), Sex, and Age. These were completed for left hemisphere (LH) and right hemisphere (RH). Correlations with  $p < 0.05$  are highlighted in yellow. Subfield Abbreviations include: Cornu Ammonis (CA), Granule Cell and Molecular Layer of Dentate Gyrus (GC-ML-DG); Hippocampus-Amygdala-Transition-Area (HATA); Hippocampal Parcellation (HP). Values were derived using Freesurfer 7 longitudinal processing stream.

Correlations between spatial reliability and subject-level variables for the amygdala nuclei are reported in Table S4. Image quality was significantly and negatively related to several amygdala nuclei bilaterally including the lateral nucleus, the basal nucleus, the accessory basal nucleus, the corticoamygdaloid transition, and the anterior amygdaloid area (at  $p < 0.05$ , see Table S4). These correlations indicate that image quality is more related to spatial reliability in amygdala regions when the longitudinal processing pipeline is used, compared to the cross-sectional pipeline. The spatial reliability of a minority of regions was also significantly associated with sex; we observed no significant associations between age and image quality in longitudinally-derived metrics of reliability.

Table S4.

| Region                       | MRIQ r Dice |       | Sex r Dice |       | Age r Dice |      |
|------------------------------|-------------|-------|------------|-------|------------|------|
|                              | LH          | RH    | LH         | RH    | LH         | RH   |
| Lateral Nucleus              | -0.20       | 0.22  | -0.09      | -0.05 | 0.04       | 0.02 |
| Basal Nucleus                | -0.18       | -0.14 | -0.02      | -0.05 | 0.00       | 0.05 |
| Central Nucleus              | -0.06       | -0.09 | 0.05       | 0.01  | -0.00      | 0.03 |
| Medial Nucleus               | -0.05       | -0.05 | -0.02      | -0.13 | 0.00       | 0.02 |
| Cortical Nucleus             | -0.04       | -0.01 | 0.00       | 0.00  | 0.01       | 0.04 |
| Accessory Basal Nucleus      | -0.10       | -0.13 | -0.00      | 0.03  | 0.01       | 0.04 |
| Paralamina Nucleus           | -0.19       | -0.06 | 0.02       | 0.02  | 0.029      | 0.04 |
| Corticoamygdaloid Transition | -0.19       | -0.17 | -0.04      | -0.08 | 0.06       | 0.05 |
| Anterior Amygdaloid Area     | -0.12       | -0.15 | 0.00       | -0.05 | 0.06       | 0.04 |

Additional file Table S4: Correlation coefficient for bivariate correlations between Hippocampal Subfield Dice Coefficients and subject-level covariates: MRI Quality (Difference Score; MRIQ), Sex, and Age. These were completed for left hemisphere (LH) and right hemisphere (RH). Correlations with  $p < 0.05$  are highlighted in yellow. Values were derived using Freesurfer 7 longitudinal processing stream.

## **Volumes of Hippocampal Subfields and Amygdala Subnuclei**

Supplemental Tables 5 and 6 display the average volumes per each subregion for hippocampal subfields (Table S5) and amygdala subnuclei (Table S6) in millimeters cubed (mm<sup>3</sup>).

Table S5.

| Region                  | Mean LH (mm <sup>3</sup> ) | SD LH (mm <sup>3</sup> ) | Mean RH (mm <sup>3</sup> ) | SD RH (mm <sup>3</sup> ) |
|-------------------------|----------------------------|--------------------------|----------------------------|--------------------------|
| Parasubiculum           | 58.177                     | 11.861                   | 56.730                     | 11.647                   |
| Presubiculum Head       | 145.911                    | 21.557                   | 139.207                    | 17.880                   |
| Presubiculum Body       | 195.045                    | 31.730                   | 174.494                    | 30.068                   |
| Subiculum Head          | 175.739                    | 25.808                   | 168.611                    | 21.784                   |
| Subiculum Body          | 220.748                    | 32.603                   | 204.475                    | 26.823                   |
| CA1 Head                | 610.509                    | 82.839                   | 645.382                    | 84.665                   |
| CA1 Body                | 112.928                    | 24.457                   | 124.537                    | 24.619                   |
| CA3 Head                | 119.278                    | 22.007                   | 132.774                    | 23.703                   |
| CA3 Body                | 89.443                     | 22.104                   | 106.334                    | 25.281                   |
| CA4 Head                | 133.301                    | 18.223                   | 142.190                    | 19.196                   |
| CA4 Body                | 125.232                    | 15.256                   | 129.543                    | 16.879                   |
| GC ML DG Head           | 153.987                    | 21.788                   | 165.679                    | 23.135                   |
| GC ML DG Body           | 129.832                    | 15.375                   | 133.440                    | 15.210                   |
| Molecular Layer HP Head | 317.304                    | 38.619                   | 326.809                    | 37.008                   |
| Molecular Layer HP Body | 211.265                    | 25.768                   | 221.750                    | 28.094                   |
| Fimbria                 | 75.177                     | 19.106                   | 69.673                     | 17.413                   |
| Hippocampal Fissure     | 125.652                    | 32.431                   | 147.475                    | 33.396                   |
| Hippocampal Tail        | 602.868                    | 82.474                   | 628.700                    | 81.715                   |
| HATA                    | 67.314                     | 11.869                   | 72.912                     | 12.926                   |

Additional file Table S5: Mean and standard deviation (SD) volume estimates across three scans for each Hippocampal Subfield (LH = Left Hemisphere, RH = Right Hemisphere) in millimeters cubed (mm<sup>3</sup>). Subfield abbreviations include: Cornu Ammonis (CA), Granule Cell and Molecular Layer of Dentate Gyrus (GC-ML-DG); Hippocampus-Amygdala-Transition-Area (HATA); Hippocampal Parcellation (HP). Volume estimates derived using the FreeSurfer 7 longitudinal processing pipeline.

Table S6.

| Region                       | Mean LH (mm3) | SD LH (mm3) | Mean RH (mm3) | SD RH (mm3) |
|------------------------------|---------------|-------------|---------------|-------------|
| Lateral Nucleus              | 703.861       | 85.709      | 726.398       | 84.255      |
| Basal Nucleus                | 381.172       | 44.789      | 406.082       | 45.613      |
| Central Nucleus              | 45.166        | 9.002       | 49.432        | 9.010       |
| Medial Nucleus               | 8.149         | 4.465       | 8.972         | 4.636       |
| Cortical Nucleus             | 22.509        | 5.364       | 24.912        | 4.733       |
| Accessory Basal Nucleus      | 293.489       | 40.942      | 322.167       | 42.724      |
| Paralaminar Nucleus          | 35.430        | 5.513       | 35.700        | 4.984       |
| Corticoamygdaloid Transition | 173.944       | 23.821      | 185.766       | 24.465      |
| Anterior Amygdaloid Area     | 28.963        | 6.459       | 31.781        | 6.273       |

Additional file Table S6: Mean and standard deviation (SD) volume estimates across three scans for Amygdala Subnuclei (LH = Left Hemisphere, RH = Right Hemisphere) in millimeters cubed (mm3). Volume estimates derived using the FreeSurfer 7 longitudinal processing pipeline.
